# Supplementary material
Source: Springer Nature journal article supplement (https://www.springermedizin.de/resource/supplementary/12936_2012_2155_MOESM5_ESM.pdf/9542752)
Supplement: MOESM5 [file 9542752]

|        |   |                                                                             |    |
|--------|---|-----------------------------------------------------------------------------|----|
| PkNBPA | 1 | MKKNGLWGASFG-VLILLMGASWEQVISE--SNKQKKEETNSSVNYWGG---RNSDGYPRRKRKLNKQKHS---- | 65 |
| PkNBPA | 1 | MGRNPFLLFFCHLLFIHSGSCKDNNRSQHH-RPKRDLRLSPIHVTSLRSDQ-LEQIREAREHEQNNNSDNDNDY  | 73 |
| PvRBP2 | 1 | MEKNVLWVIFYNFLVILLASCNDSNRKSKN-SLKSESKSLPTYANLMRNGQDKYNNAKTEDNIGNQINNDNNHNG | 74 |
| PIRH2a | 1 | MKITLFCISISFCNIIFFFLELSHEHFVGQ--SSNTHGASSVTDNFSE-----KN---LKSFEKGKNNNDN---- | 62 |

|        |    |                                                                          |     |
|--------|----|--------------------------------------------------------------------------|-----|
| PkNBPA | 66 | LFP-----GKEEYRKSNTPSGKSGNESELYRKNSLIHVGDGTFGRKPSRYA--YIKRNN-             | 117 |
| PkNBPA | 74 | LNVDSKNNQKLLNSDEHNNNSDNDYPNENSKNNQKLLNYDEENNSSFISLKKYKIARKPSRYS--YLDQDKK | 146 |
| PvRBP2 | 75 | YNDNR-----INSEYPKTS-----HLQHSPSLVHLNDHKFTTKPSRHS--YVQRNSI                | 119 |
| PIRH2a | 63 | YAS-----INRLYRKK--P-----YMKRSLINLENDLFRLEPISYIQRYYKKNIN                  | 105 |

C<sup>193</sup>

|        |     |                                                                            |     |
|--------|-----|----------------------------------------------------------------------------|-----|
| PkNBPA | 118 | -EDNFYRN---ASSTKDANNRLNGIIS--SFLQNMKAPTIDR-----ILDYYEIVNNGK--ELVFSLESY     | 174 |
| PkNBPA | 147 | IYTVNTEDKEKKYIQKINTPSNTFIQ--KAKGRSHGIVTQVN-----NLDYVVMNDD--NIISLFRPY       | 208 |
| PvRBP2 | 120 | YKRNTNNN--MENTNNELVHVPNFFIQ--EKKAAPQKPSVQNTPTATQIVYNNLDYLNAFDDTN--NISAFKPH | 188 |
| PIRH2a | 106 | RSDIFHNKKERKSGKYVSNVSSFHSFIQ--EGKEEVEVFSIWGS-----NSVLDHIDVLRDNG--TVVFSVQPY | 169 |

C<sup>254</sup>

|        |     |                                                                           |     |
|--------|-----|---------------------------------------------------------------------------|-----|
| PkNBPA | 175 | YVDIYTCEEIVNSIKRKGSTNSRDNPGDEPEKKGDKDNNHNSGDKEDSMIKKLYDNMELLRMSFS---IKSEL | 246 |
| PkNBPA | 209 | NPEIYSFRENKHAYE-----RNELLNKKVLTIHND-EIKRIEDILSRSMKECSN---QTSEL            | 261 |
| PvRBP2 | 189 | HPIIYYFKQLEHFA-----NSYYDLRNKIKDYFALP--MKQASDVVEKVKDCLQ--NINES             | 241 |
| PIRH2a | 170 | YLDIYTCKEAILFT-----TSFYKDLKSSITKINED--IEKFNEEIIKNEEQCLVG--GKTDF           | 224 |

C<sup>298</sup>

C<sup>326</sup>

|        |     |                                                                              |     |
|--------|-----|------------------------------------------------------------------------------|-----|
| PkNBPA | 247 | QGKINSLEYAQ-TEGNEQV-SGTSNSKTYKLIEDEYVNLKLN---NSENAKMIISNTMKSIEEEYGGKIFCP--K  | 313 |
| PkNBPA | 262 | SVLINHLENPE-RYEIPES-EYGAKKQNYKDKLSILHEIMKRN--NKHKEEIKKSHSRIYGTIDHMDSWT--N    | 330 |
| PvRBP2 | 242 | RILMTQLENPQ-NYNDISD-KYDEKVKYKKKIEDMQILKDSY--IKNFKAIMSANLKMNLALNGIYIHWY--L    | 311 |
| PIRH2a | 225 | DNLLIVLENAE-KANVRKT-LFDNTFNDYKNNKSSFYNLKLN---KKNDYDKKINNINIKNEITKLLKNIEGTG-K | 292 |

C<sup>332</sup>

|        |     |                                                    |     |
|--------|-----|----------------------------------------------------|-----|
| PkNBPA | 314 | ECNSAVYFENARSYISYVSNNTDVWYNSNISDAKEFLKSAKSIV--SII  | 361 |
| PkNBPA | 331 | YCPTGTYYNMIALRRMDVTNYNIRDITSFLKKIKEIYIFGQDIM--KEIK | 378 |
| PvRBP2 | 312 | TCSTKTYDDIVKEYAIEINOFDEKKSISFMDNMKKIHKSAIDTL--KKMK | 359 |
| PIRH2a | 293 | MCKTESYVMNNLYLLRVNEVKSTPIDLYLNRKELLESSSKLV--NPIK   | 340 |
